# Supplementary material for: Rh particles in N-doped porous carbon materials derived from ZIF-8 as an efficient bifunctional electrocatalyst for the ORR and HER
Source: Royal Society of Chemistry journal article supplement (doi:10.1039/d1ra00484k), 2021-01-01
Supplement: d1ra00484k1.pdf [file d1ra00484k1.pdf]

1

## Supporting Information

2

# 3 Rh Particles in N-doped Porous Carbon Materials 4 Derived from ZIF-8 as An Efficient Bifunctional 5 Electrocatalyst for ORR and HER

6 Can Sun, Xinde Duan, Jiajun Song, Mengxian Zhang, Yachao Jin, Mingdao Zhang\*, Li Song\*  
7 and Hui Cao\*

8

9 School of Environmental Science and Engineering, Jiangsu Key Laboratory of Atmospheric  
10 Environment Monitoring and Pollution Control, Jiangsu Collaborative Innovation Center of  
11 Atmospheric Environment, Nanjing University of Information Science & Technology, Nanjing  
12 210044, Jiangsu, P. R. China. E-mail: matchlessjimmy@163.com, songli@nuist.edu.cn,  
13 yccaoh@hotmail.com.

14

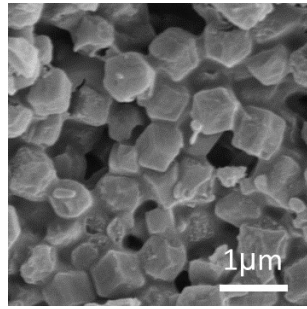

1  
2  
3  
4

**Fig. S1** SEM images of Glu-ZIF.

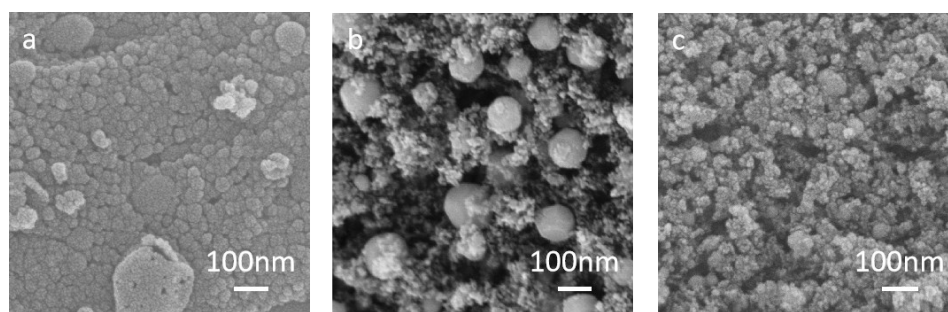

1  
2  
3  
4

**Fig. S2** SEM images of (a) RhNC-800, (b) RhNC-900 and (c) RhNC-1000.

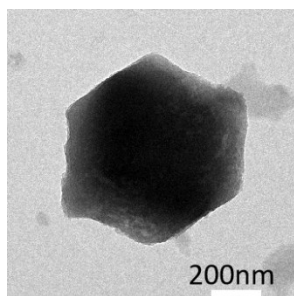

1  
2  
3  
4

**Fig. S3** TEM image of Rh-ZIF.

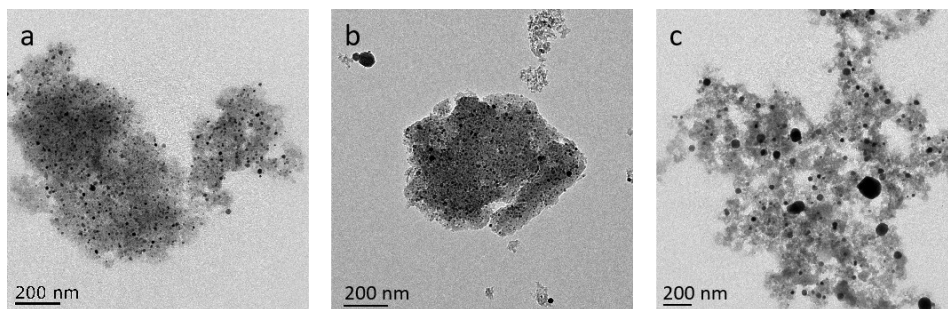

1

2

3 **Fig. S4** TEM images of (a) RhNC-800, (b) RhNC-900 and (c) RhNC-1000 pyrolysis

4

from Rh-ZIF.

5

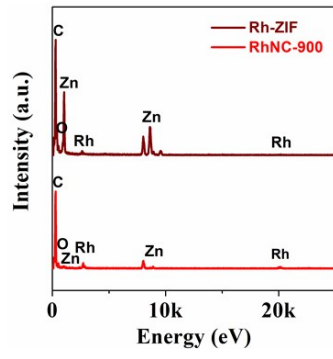

1  
2  
3  
4

**Fig. S5** EDS spectrum of Rh-ZIF and RhNC-900.

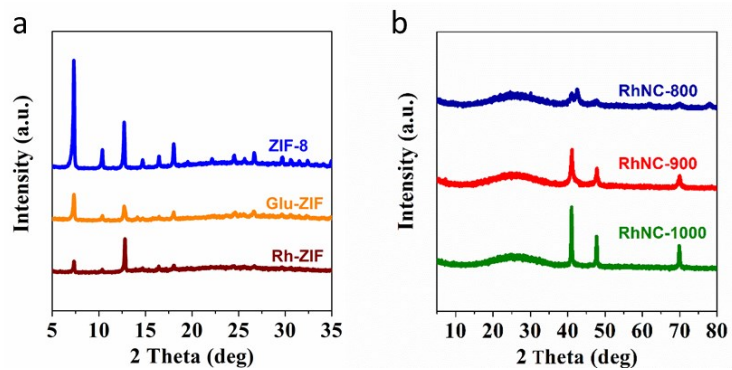

1

2

3 **Fig. S6** XRD patterns of (a) ZIF-8, Glu-ZIF and Rh-ZIF, and (b) RhNC-800, 900 and

4

1000.

5

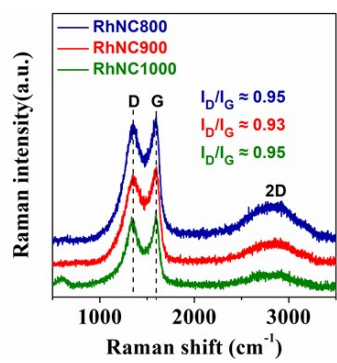

1  
2  
3  
4

**Fig. S7** Raman spectra of RhNC-800, 900 and 1000.



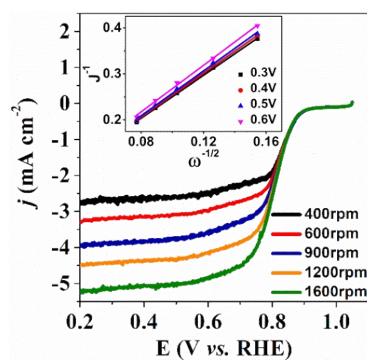

1

2

3 **Fig. S8.** LSV curves of RhNC-900 at different rotation rates (rpm). The inset shows  
4 K-L plots obtained from LSVs at different potentials.

5

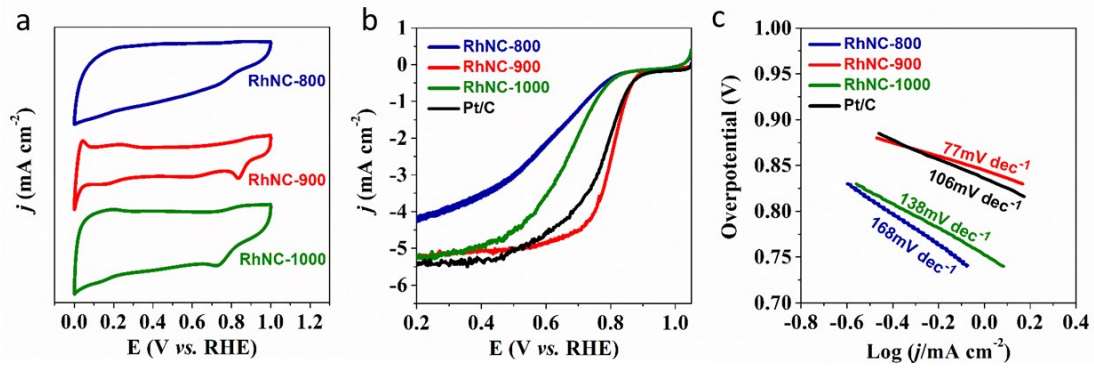

1

2

3 **Fig. S9** Electrochemical oxygen reduction of samples. (a) CV curves of RhNC-T  
 4 under O<sub>2</sub>- saturated 0.1 M KOH solution. (b) LSV curves and (c) tafel slopes of  
 5 RhNC-T and Pt/C catalysts obtained at an RDE (1600 rpm.) recorded in O<sub>2</sub>- saturated  
 6 0.1 M KOH solution.

7

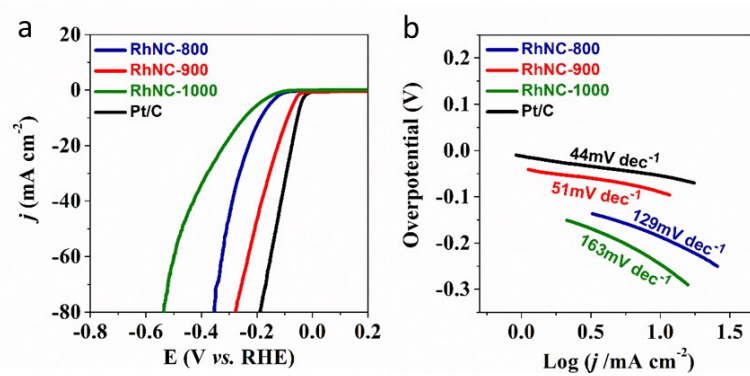

1

2

3 **Fig. S10** Electrochemical hydrogen reduction of samples. (a) LSV curves and (b) Tafel  
 4 slopes of RhNC-T and Pt/C catalysts obtained at an RDE (1600 rpm.) recorded in N<sub>2</sub>-  
 5 saturated 0.5M H<sub>2</sub>SO<sub>4</sub> solution.

6

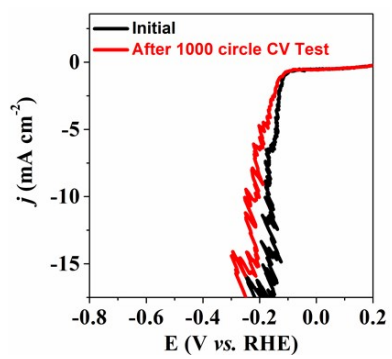

1

2

3 **Fig. S11** LSV curves of RhNC-900 loaded on glass-carbon electrodes in N<sub>2</sub>- saturated  
4 0.5 M H<sub>2</sub>SO<sub>4</sub> solution before and after CV test.

5

1 **Table S1** Element content for NC-900 tested by XPS and RhNC-900 tested by XPS  
2 and ICP.

3

| Sample   | XPS (at.%) |       |      |      |      | ICP (wt.%) |       |
|----------|------------|-------|------|------|------|------------|-------|
|          | C          | O     | N    | Rh   | Zn   | Rh         | Zn    |
| NC-900   | 81.83      | 10.50 | 6.54 | /    | 1.13 | /          | /     |
| RhNC-900 | 80.91      | 10.01 | 6.13 | 0.04 | 0.01 | 1.47       | 14.67 |

4
